# Supplementary material
Source: PubMed Central journal article supplement (PMC7079981)

Analytical and Bioanalytical Chemistry

Electronic Supplementary Material

**Design and application of GB virus C (GBV-C) peptide microarrays for diagnosis of GBV-C / HIV-1 co-infection**

Leticia Fernández, M. José Bleda, M. José Gómara and Isabel Haro

**Table S1.** Description of fluorescence values of microarray assays for the three groups of sera by antigenic zone. Median and Interquartile Range (IR)

|                 | Peptide    | Sera                      |      |                          |      |                          |       |
|-----------------|------------|---------------------------|------|--------------------------|------|--------------------------|-------|
|                 |            | Negative controls<br>n=38 |      | HIV-1+/E2 GBV-C-<br>n=38 |      | HIV-1+/E2 GBV-C+<br>n=38 |       |
|                 |            | Median                    | IR   | Median                   | IR   | Median                   | IR    |
| <b>Zone I</b>   | <b>P1</b>  | 1                         | 39   | -37                      | 98   | -70                      | 151   |
|                 | <b>P2</b>  | 15                        | 445  | 185                      | 1480 | 359                      | 1459  |
|                 | <b>P3</b>  | -427                      | 1336 | 959                      | 2298 | 2160                     | 2099  |
|                 | <b>P4</b>  | -317                      | 1093 | 2249                     | 3355 | 3661                     | 3353  |
|                 | <b>P5</b>  | -425                      | 1041 | 400                      | 1023 | 656                      | 919   |
|                 | <b>P6</b>  | 12                        | 855  | 285                      | 1562 | 1060                     | 1857  |
|                 | <b>P7</b>  | 37                        | 755  | 203                      | 657  | 187                      | 1019  |
|                 | <b>P8</b>  | -11                       | 90   | -60                      | 199  | -84                      | 241   |
|                 | <b>P9</b>  | -4                        | 80   | -113                     | 231  | -154                     | 265   |
| <b>Zone II</b>  | <b>P10</b> | 773                       | 1153 | 1156                     | 2420 | 1571                     | 3982  |
|                 | <b>P11</b> | 250                       | 246  | 783                      | 1349 | 1130                     | 1099  |
|                 | <b>P12</b> | 912                       | 650  | 4383                     | 6182 | 6184                     | 3975  |
|                 | <b>P13</b> | 81                        | 167  | 547                      | 930  | 1014                     | 942   |
|                 | <b>P14</b> | 391                       | 1463 | 1427                     | 3419 | 3232                     | 5373  |
|                 | <b>P15</b> | 413                       | 417  | 6088                     | 9051 | 8277                     | 10297 |
|                 | <b>P16</b> | 263                       | 458  | 2557                     | 4147 | 4078                     | 3638  |
|                 | <b>P17</b> | 159                       | 316  | 2453                     | 4475 | 4156                     | 3130  |
|                 | <b>P18</b> | 133                       | 194  | 1011                     | 1648 | 1687                     | 1294  |
|                 | <b>P19</b> | 159                       | 184  | 423                      | 781  | 800                      | 1232  |
|                 | <b>P20</b> | 296                       | 330  | 742                      | 1964 | 1573                     | 4453  |
|                 | <b>P21</b> | -3                        | 88   | -130                     | 328  | -76                      | 507   |
|                 | <b>P22</b> | -49                       | 110  | -150                     | 230  | -177                     | 342   |
|                 | <b>P23</b> | -92                       | 221  | -134                     | 316  | -170                     | 356   |
|                 | <b>P24</b> | -255                      | 795  | 878                      | 1313 | 2087                     | 2922  |
|                 | <b>P25</b> | -86                       | 366  | -278                     | 548  | -18                      | 754   |
|                 | <b>P26</b> | 86                        | 210  | -11                      | 243  | -17                      | 221   |
| <b>P27</b>      | 13         | 327                       | 55   | 547                      | 208  | 753                      |       |
| <b>Zone III</b> | <b>P45</b> | 47                        | 68   | -88                      | 172  | -94                      | 243   |
|                 | <b>P46</b> | 203                       | 436  | 43                       | 744  | 155                      | 669   |
|                 | <b>P47</b> | 67                        | 119  | 8                        | 196  | 20                       | 192   |
|                 | <b>P48</b> | 71                        | 107  | -18                      | 148  | 39                       | 248   |
|                 | <b>P49</b> | 246                       | 422  | 551                      | 1188 | 738                      | 1606  |
|                 | <b>P50</b> | -59                       | 199  | 593                      | 2412 | 887                      | 2619  |
|                 | <b>P51</b> | -248                      | 3187 | 826                      | 2712 | 1216                     | 4028  |
|                 | <b>P52</b> | 763                       | 859  | 1799                     | 2573 | 3550                     | 6006  |
|                 | <b>P53</b> | 191                       | 186  | 183                      | 912  | 165                      | 871   |
|                 | <b>P54</b> | -25                       | 46   | 96                       | 1369 | 536                      | 2945  |
|                 | <b>P55</b> | 45                        | 510  | -233                     | 790  | -142                     | 943   |
| <b>Controls</b> | <b>C1</b>  | 59                        | 77   | -18                      | 253  | -3                       | 330   |
|                 | <b>C2</b>  | 27                        | 186  | 3                        | 141  | 5                        | 192   |

**Table S2.** Second Selection: fluorescence comparison between pairs of panels. Results of Wilcoxon Rank-Sum Test (p-values). Multiple comparison adjustment using *False Discovery Rate* (FDR) correction with Simes's method. A comparison is considered statistically significant if the corresponding p-value is lower or equal the specific  $\alpha_{corrected}$  for this comparison. Selected peptides(shadowed) were those peptides with greater fluorescence values in HIV-1+/E2GBV-C- panel than in Negative Controls panel AND greater values in HIV-1+/E2GBV-C+ panel than in HIV-1+/E2GBV-C- panel AND with a median of fluorescence greater than 1,000 in HIV-1+/E2GBV-C+ panel

| Peptide  |                   | Negative controls<br>vs<br>HIV-1+/E2GBV-C- |                     | HIV-1+/E2GBV-C-<br>vs<br>HIV-1+/E2GBV-C+ |                     |
|----------|-------------------|--------------------------------------------|---------------------|------------------------------------------|---------------------|
|          |                   | p-value                                    | $\square$ corrected | p-value                                  | $\square$ corrected |
| Zone I   | P1                | ---                                        |                     | ---                                      |                     |
|          | P2                | 0,0239*                                    | 0,0350              | 0,4907                                   | 0,0457              |
|          | P3                | 0,0000*                                    | 0,0007              | 0,0000*                                  | 0,0129              |
|          | P4                | 0,0000*                                    | 0,0014              | 0,0000*                                  | 0,0136              |
|          | P5**              | 0,0000*                                    | 0,0021              | 0,0003*                                  | 0,0236              |
|          | P6                | 0,0175*                                    | 0,0343              | 0,0000*                                  | 0,0143              |
|          | P7                | 0,0008*                                    | 0,0257              | 0,9316                                   | 0,0500              |
|          | P8                | 0,0008*                                    | 0,0264              | 0,1433                                   | 0,0379              |
|          | P9                | ---                                        |                     | 0,1125                                   | 0,0364              |
| Zone II  | P10               | 0,0007*                                    | 0,0250              | 0,0001*                                  | 0,0221              |
|          | P11 <sup>o</sup>  | 0,0000*                                    | 0,0029              | 0,0128*                                  | 0,0336              |
|          | P12               | 0,0000*                                    | 0,0036              | 0,0009*                                  | 0,0271              |
|          | P13               | 0,0000*                                    | 0,0043              | 0,0000*                                  | 0,0150              |
|          | P14               | 0,0000*                                    | 0,0050              | 0,0000*                                  | 0,0157              |
|          | P15               | 0,0000*                                    | 0,0057              | 0,0000*                                  | 0,0164              |
|          | P16               | 0,0000*                                    | 0,0064              | 0,0000*                                  | 0,0171              |
|          | P17               | 0,0000*                                    | 0,0071              | 0,0000*                                  | 0,0179              |
|          | P18               | 0,0000*                                    | 0,0079              | 0,0000*                                  | 0,0186              |
|          | P19 <sup>oo</sup> | 0,0000*                                    | 0,0086              | 0,0000*                                  | 0,0193              |
|          | P20               | 0,0268*                                    | 0,0357              | 0,0000*                                  | 0,0200              |
|          | P21               | 0,0000*                                    | 0,0093              | 0,3264                                   | 0,0421              |
|          | P22               | 0,0000*                                    | 0,0100              | 0,1823                                   | 0,0407              |
|          | P23               | 0,0064*                                    | 0,0321              | 0,2023                                   | 0,0414              |
|          | P24               | 0,0000*                                    | 0,0107              | 0,0000*                                  | 0,0207              |
| P25**    | 0,0027*           | 0,0286                                     | 0,0039*             | 0,0293                                   |                     |
| P26      | ---               |                                            | 0,6538              | 0,0464                                   |                     |
| P27      | 0,3617            | 0,0429                                     | 0,1809              | 0,0400                                   |                     |
| Zone III | P45               | ---                                        |                     | 0,0900                                   | 0,0493              |
|          | P46               | ---                                        |                     | 0,3993                                   | 0,0436              |
|          | P47               | ---                                        |                     | 0,4277                                   | 0,0450              |
|          | P48               | ---                                        |                     | 0,0054*                                  | 0,0314              |
|          | P49               | 0,0005*                                    | 0,0243              | 0,7403                                   | 0,0471              |
|          | P50               | 0,0000*                                    | 0,0114              | 0,9233                                   | 0,0486              |
|          | P51               | 0,0002*                                    | 0,0229              | 0,0044*                                  | 0,0307              |
|          | P52               | 0,0000*                                    | 0,0121              | 0,0000*                                  | 0,0214              |
|          | P53               | 0,1500                                     | 0,0386              | 0,7815                                   | 0,0479              |
|          | P54 <sup>oo</sup> | 0,0016*                                    | 0,0279              | 0,0042*                                  | 0,0300              |
|          | P55               | ---                                        |                     | 0,1570                                   | 0,0393              |

--- Inconsistent comparison: inconsistent fluorescence values between panels (greater values of fluorescence in Negative control panel than in HIV-1+/E2GBV-C- AND/OR greater values of fluorescence in HIV-1+/E2GBV-C- panel than in HIV-1+/E2GBV-C+).

\* Comparison statistically significant ( $p\text{-value} \leq \alpha_{\text{corrected}}$ ).

\*\* Median of fluorescence less than 1,000 in HIV-1+/E2GBV-C+ panel.

° P11: special case of a non selected peptide because even though meeting all the criteria, the 75<sup>th</sup> percentiles of fluorescence in HIV-1+/E2GBV-C- and HIV-1+/E2GBV-C+ panels were almost identical (1,749 and 1764,5).

°° P19 and P54: special cases of selected peptides even though not meeting one criteria. Median of fluorescence less than 1,000 but with 75<sup>th</sup> percentile values high (1,661.5 and 2,902 respectively).

Fig. S1. ROC curves

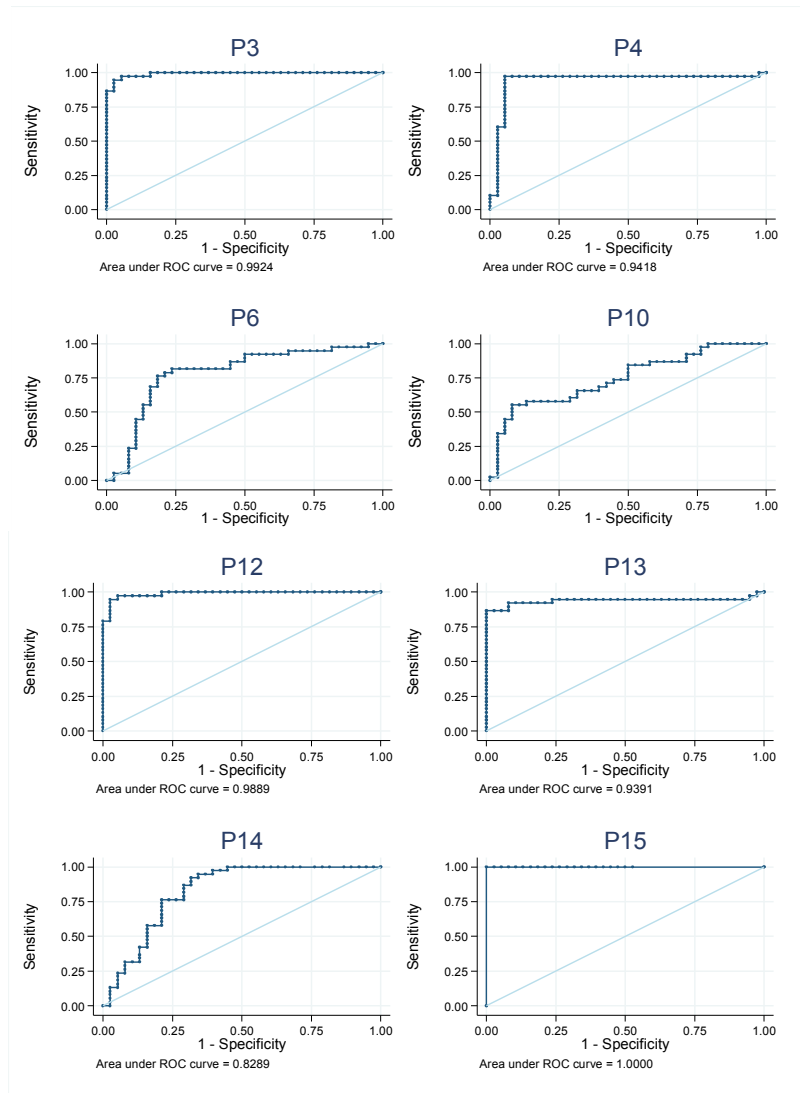

Fig. S1. (continued) ROC curves

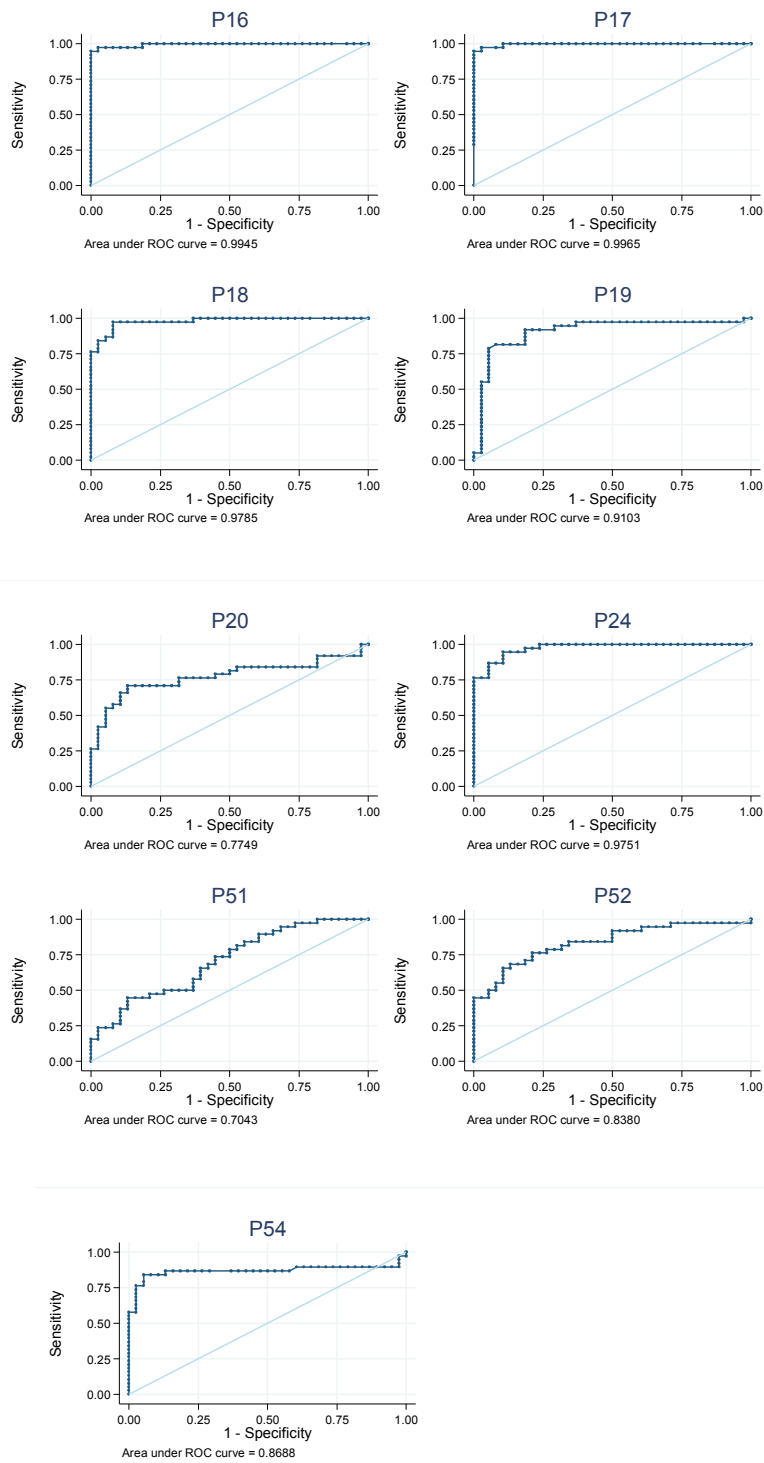

**Fig. S2.** Distribution of fluorescence values for HIV-1+/E2 GBV-C+ group (as positive control) and negative controls serum samples by peptide. The cut-off value of each peptide is the horizontal red line

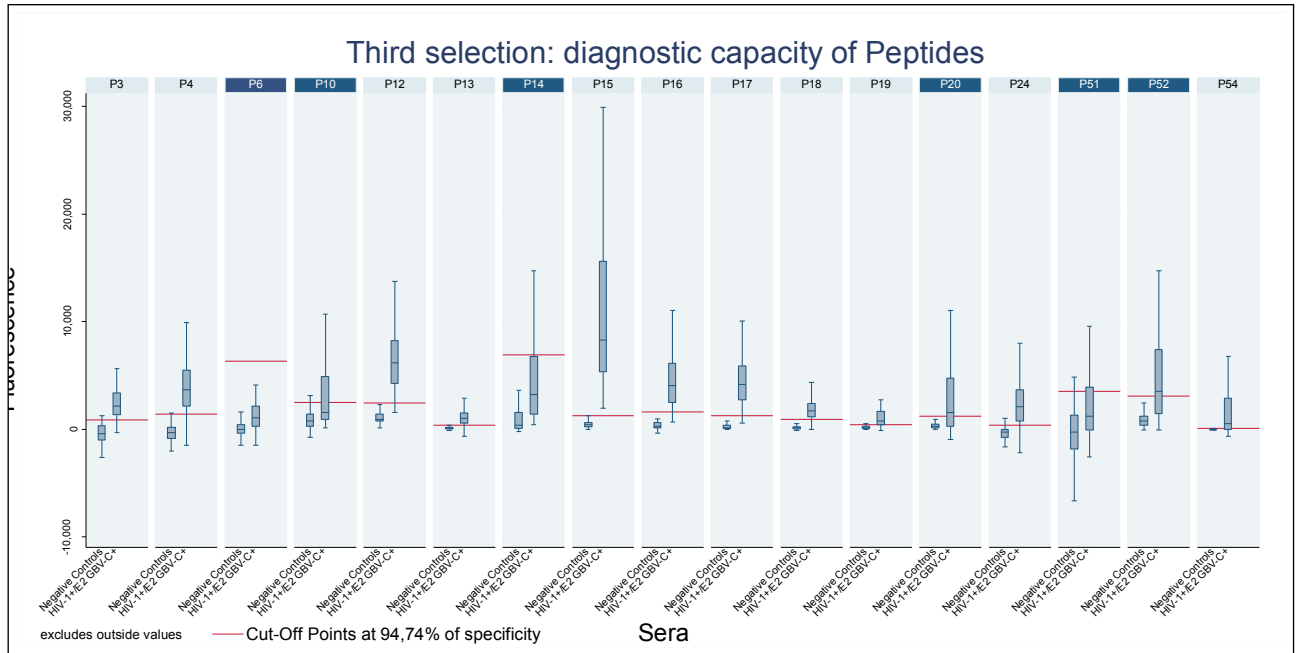

Supplement: 216_2012_6585_MOESM1_ESM.pdf [file 216_2012_6585_MOESM1_ESM.pdf]
